# Supplementary material
Source: publisher figshare collection journal article supplement (https://karger.figshare.com/ndownloader/files/17448731)
Supplement: Supplementary file 1 [file 17448731]

**Legend to Supplementary Figure S1**

Supplementary Figure S1. Histograms of propensity score distribution (A) before matching and (B) after matching
